# Supplementary material for: [1]Ferrocenophane Bridged by a 9-Silafluorenylidene Moiety
Source: MDPI journal article supplement (doi:10.3390/inorganics12030066), 2024-02-22
Supplement: s1 [file s1]

Supporting Information for

**[1]Ferrocenophane Bridged by a 9-Silafluorenylidene Moiety**

Shinnosuke Usuba <sup>1</sup>, Koh Sugamata <sup>2</sup>, Shogo Morisako <sup>3,†</sup> and Takahiro Sasamori <sup>1,3,4\*</sup>

1 Graduate School of Science and Technology, University of Tsukuba, 1-1-1 Tennoudai,  
Tsukuba 305-8571, Ibaraki, Japan; usuba@dmb.chem.tsukuba.ac.jp

2 Department of Chemistry, College of Science, Rikkyo University, 3-34-1 Nishi-Ikebukuro, Toshima-ku,  
Tokyo 171-8501, Japan; sugamata@rikkyo.ac.jp

3 Division of Chemistry, Institute of Pure and Applied Sciences, University of Tsukuba, 1-1-1 Tennoudai,  
Tsukuba 305-8571, Ibaraki, Japan; s-morisako@sagami.or.jp

4 Tsukuba Research Center for Energy Materials Sciences (TREMS), University of Tsukuba, 1-1-1 Tennoudai,  
Tsukuba 305-8571, Ibaraki, Japan

\* Correspondence: sasamori@chem.tsukuba.ac.jp; Tel.: +81-29-853-4412

† Current address: Sagami Chemical Research Institute, Hayakawa 2743-1, Ayase 252-1193, Kanagawa, Japan.

## Contents

|                                                      |    |
|------------------------------------------------------|----|
| 1. NMR spectra of sila[1]ferrocenophane <b>1</b>     | S3 |
| 2. Coordinates of theoretically optimized structures | S4 |
| 3. References                                        | S6 |

## 1. NMR spectra of sila[1]ferrocenophane 1.

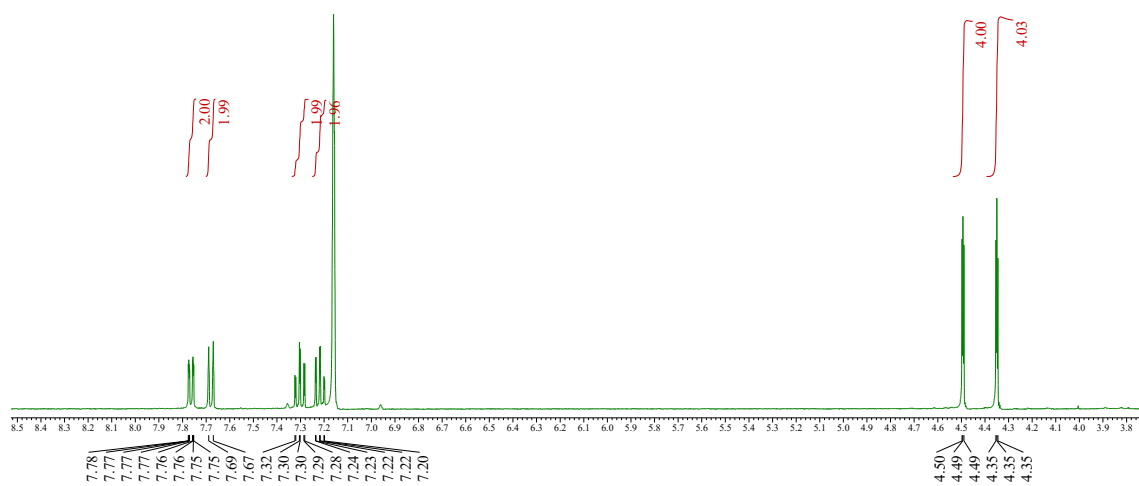

Figure S1.  $^1\text{H}$  NMR spectrum of 1 in  $\text{C}_6\text{D}_6$ .

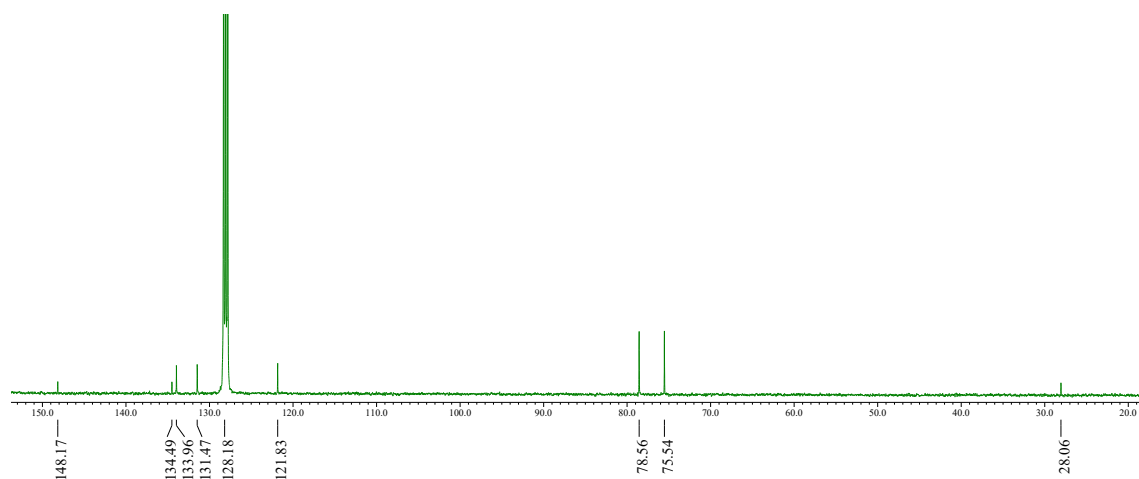

Figure S2.  $^{13}\text{C}\{^1\text{H}\}$  NMR spectrum of 1 in  $\text{C}_6\text{D}_6$ .

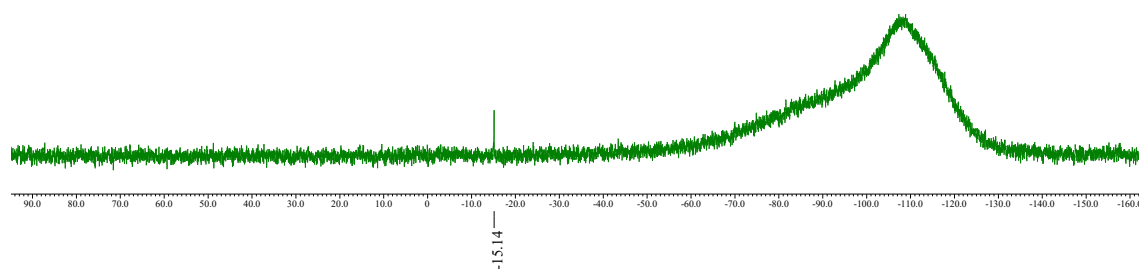

Figure S3.  $^{29}\text{Si}\{^1\text{H}\}$  NMR spectrum of 1 in  $\text{C}_6\text{D}_6$ .

## 2. Coordinates of theoretically optimized structures

**Theoretical calculations:** All calculations were carried out using the density functional theory (DFT) method with a B3PW91-D3(BJ) functional,<sup>[S1,S2]</sup> and geometry optimizations and vibrational frequencies were calculated in the gas phase using the 6-311G(3d) basis sets, as implemented in the Gaussian 16 program package.<sup>[S3]</sup> Computational time was generously provided by the Supercomputer Laboratory at the Institute for Chemical Research (Kyoto University). The coordinates of the optimized structures are shown below.

**Optimized structures:** .xyz file format.

· Compound 1

40

Compound\_1,9-Sifluorenylidene[1]ferrocenophane

|    |          |          |          |
|----|----------|----------|----------|
| Fe | 2.43864  | -0.00042 | 0.00005  |
| Si | -0.22958 | -0.00067 | -0.00017 |
| C  | 1.87333  | 1.14752  | 1.56464  |
| H  | 1.56345  | 2.17833  | 1.45958  |
| C  | 1.87383  | -1.14762 | 1.56535  |
| H  | 1.56440  | -2.17865 | 1.46114  |
| C  | 1.87346  | 1.14680  | -1.56504 |
| H  | 1.56333  | 2.17760  | -1.46068 |
| C  | 3.20825  | -0.71063 | 1.78514  |
| H  | 4.07032  | -1.34754 | 1.92541  |
| C  | 1.01416  | -0.00109 | -1.40699 |
| C  | -2.78825 | 0.74136  | -0.00004 |
| C  | 1.87424  | -1.14836 | -1.56485 |
| H  | 1.56497  | -2.17940 | -1.46018 |
| C  | 3.20816  | 0.71063  | -1.78467 |
| H  | 4.07000  | 1.34795  | -1.92451 |
| C  | -1.51243 | -1.34508 | 0.00007  |
| C  | -2.78895 | -0.74027 | 0.00006  |
| C  | 3.20865  | -0.71128 | -1.78456 |
| H  | 4.07084  | -1.34811 | -1.92440 |
| C  | 1.01392  | -0.00028 | 1.40684  |
| C  | -2.54748 | 3.52333  | -0.00029 |
| H  | -2.46101 | 4.60539  | -0.00039 |
| C  | -1.51119 | 1.34496  | -0.00036 |
| C  | 3.20794  | 0.71127  | 1.78467  |
| H  | 4.06976  | 1.34860  | 1.92455  |
| C  | -3.92829 | -1.54032 | 0.00009  |
| H  | -4.91751 | -1.09357 | 0.00006  |
| C  | -1.40543 | 2.72937  | -0.00046 |
| H  | -0.42815 | 3.20409  | -0.00070 |
| C  | -3.92689 | 1.54243  | 0.00017  |
| H  | -4.91650 | 1.09656  | 0.00044  |
| C  | -3.80247 | 2.92597  | 0.00003  |

|   |          |          |         |
|---|----------|----------|---------|
| H | -4.69469 | 3.54466  | 0.00019 |
| C | -1.40792 | -2.72957 | 0.00009 |
| H | -0.43107 | -3.20518 | 0.00005 |
| C | -3.80514 | -2.92399 | 0.00009 |
| H | -4.69794 | -3.54183 | 0.00008 |
| C | -2.55072 | -3.52250 | 0.00008 |
| H | -2.46521 | -4.60463 | 0.00006 |

· Compound I

42

Compound\_I, Ph2Si-[1]ferrocenophane

|    |          |          |          |
|----|----------|----------|----------|
| Fe | -2.14318 | -0.00001 | -0.00000 |
| Si | 0.48689  | 0.00000  | -0.00000 |
| C  | -1.59622 | 1.14850  | -1.57306 |
| H  | -1.28229 | 2.17712  | -1.45822 |
| C  | -1.59641 | -1.14836 | -1.57321 |
| H  | -1.28267 | -2.17706 | -1.45860 |
| C  | -1.59638 | 1.14833  | 1.57322  |
| H  | -1.28258 | 2.17701  | 1.45861  |
| C  | -2.93251 | -0.71116 | -1.77600 |
| H  | -3.79791 | -1.34745 | -1.89797 |
| C  | -0.73401 | -0.00005 | 1.42663  |
| C  | 1.87080  | 2.17181  | -1.20058 |
| C  | -1.59624 | -1.14853 | 1.57308  |
| H  | -1.28231 | -2.17715 | 1.45825  |
| C  | -2.93247 | 0.71116  | 1.77604  |
| H  | -3.79786 | 1.34746  | 1.89803  |
| C  | 1.48538  | -1.56881 | 0.00003  |
| C  | 1.87092  | -2.17174 | 1.20056  |
| C  | -2.93238 | -0.71155 | 1.77594  |
| H  | -3.79769 | -1.34799 | 1.89779  |
| C  | -0.73402 | -0.00001 | -1.42663 |
| C  | 2.62150  | 3.34002  | 1.20331  |
| H  | 2.91146  | 3.79790  | 2.14425  |
| C  | 1.48530  | 1.56886  | -0.00004 |
| C  | -2.93239 | 0.71155  | -1.77589 |
| H  | -3.79768 | 1.34802  | -1.89773 |
| C  | 2.62221  | -3.33953 | 1.20342  |
| H  | 2.91272  | -3.79705 | 2.14437  |
| C  | 1.87020  | 2.17223  | 1.20049  |
| H  | 1.57067  | 1.72528  | 2.14497  |
| C  | 2.62212  | 3.33958  | -1.20344 |
| H  | 2.91259  | 3.79712  | -2.14439 |
| C  | 2.99867  | 3.92426  | -0.00007 |
| H  | 3.58390  | 4.83887  | -0.00009 |
| C  | 1.87019  | -2.17223 | -1.20050 |
| H  | 1.57061  | -1.72530 | -2.14497 |
| C  | 2.99868  | -3.92425 | 0.00005  |
| H  | 3.58389  | -4.83888 | 0.00006  |
| C  | 2.62146  | -3.34004 | -1.20333 |
| H  | 2.91135  | -3.79796 | -2.14428 |
| H  | 1.57168  | 1.72455  | -2.14504 |
| H  | 1.57186  | -1.72445 | 2.14503  |

### 3. References

- [S1] Tao, J.; Perdew, J. P.; Staroverov, V. N.; Scuseria, G. E. *Phys. Rev. Lett.* **2003**, *91*, 146401.
- [S2] Grimme, S.; Ehrlich, S.; Goerigk, L. *J. Comp. Chem.* **2011**, *32*, 1456-1465.
- [S3] Gaussian 16, Revision C.01, Frisch, M. J.; Trucks, G. W.; Schlegel, H. B.; Scuseria, G. E.; Robb, M. A.; Cheeseman, J. R.; Scalmani, G.; Barone, V.; Petersson, G. A.; Nakatsuji, H.; Li, X.; Caricato, M.; Marenich, A. V.; Bloino, J.; Janesko, B. G.; Gomperts, R.; Mennucci, B.; Hratchian, H. P.; Ortiz, J. V.; Izmaylov, A. F.; Sonnenberg, J. L.; Williams-Young, D.; Ding, F.; Lipparini, F.; Egidi, F.; Goings, J.; Peng, B.; Petrone, A.; Henderson, T.; Ranasinghe, D.; Zakrzewski, V. G.; Gao, J.; Rega, N.; Zheng, G.; Liang, W.; Hada, M.; Ehara, M.; Toyota, K.; Fukuda, R.; Hasegawa, J.; Ishida, M.; Nakajima, T.; Honda, Y.; Kitao, O.; Nakai, H.; Vreven, T.; Throssell, K.; Montgomery, J. A., Jr.; Peralta, J. E.; Ogliaro, F.; Bearpark, M. J.; Heyd, J. J.; Brothers, E. N.; Kudin, K. N.; Staroverov, V. N.; Keith, T. A.; Kobayashi, R.; Normand, J.; Raghavachari, K.; Rendell, A. P.; Burant, J. C.; Iyengar, S. S.; Tomasi, J.; Cossi, M.; Millam, J. M.; Klene, M.; Adamo, C.; Cammi, R.; Ochterski, J. W.; Martin, R. L.; Morokuma, K.; Farkas, O.; Foresman, J. B.; Fox, D. J. Gaussian, Inc., Wallingford CT, 2016.
